# Supplementary material for: In search of the most active MN4 catalyst for the oxygen reduction reaction. The case of perfluorinated Fe phthalocyanine
Source: Royal Society of Chemistry journal article supplement (doi:10.1039/c9ta09125d), 2019-01-01
Supplement: c9ta09125d1.pdf [file c9ta09125d1.pdf]

## Supporting Information

### **In search of the most active MN<sub>4</sub> catalyst for the oxygen reduction reaction. The case of perfluorinated Fe phthalocyanine.**

Gabriel Abarca<sup>a</sup>, Marco Viera,<sup>b</sup> Carolina Aliaga,<sup>b</sup> José F. Marco,<sup>c</sup> Walter Orellana,<sup>d</sup> José H. Zagal,<sup>b\*</sup> Federico Tasca<sup>b\*</sup>

<sup>a</sup>Centro de Nanotecnología Aplicada, Facultad de Ciencias, Universidad Mayor, Santiago, Chile.

<sup>b</sup>Facultad de Química y Biología, Universidad de Santiago de Chile, Santiago, Chile.

<sup>c</sup>Instituto de Química Física “Rocasolano”, CSIC, Madrid, Spain

<sup>d</sup>Departamento de Ciencias Físicas, Universidad Andres Bello, Sazié 2212, 837-0136 Santiago, Chile

\*Corresponding authors emails: [jose.zagal@usach.cl](mailto:jose.zagal@usach.cl); [federico.tasca@usach.cl](mailto:federico.tasca@usach.cl)

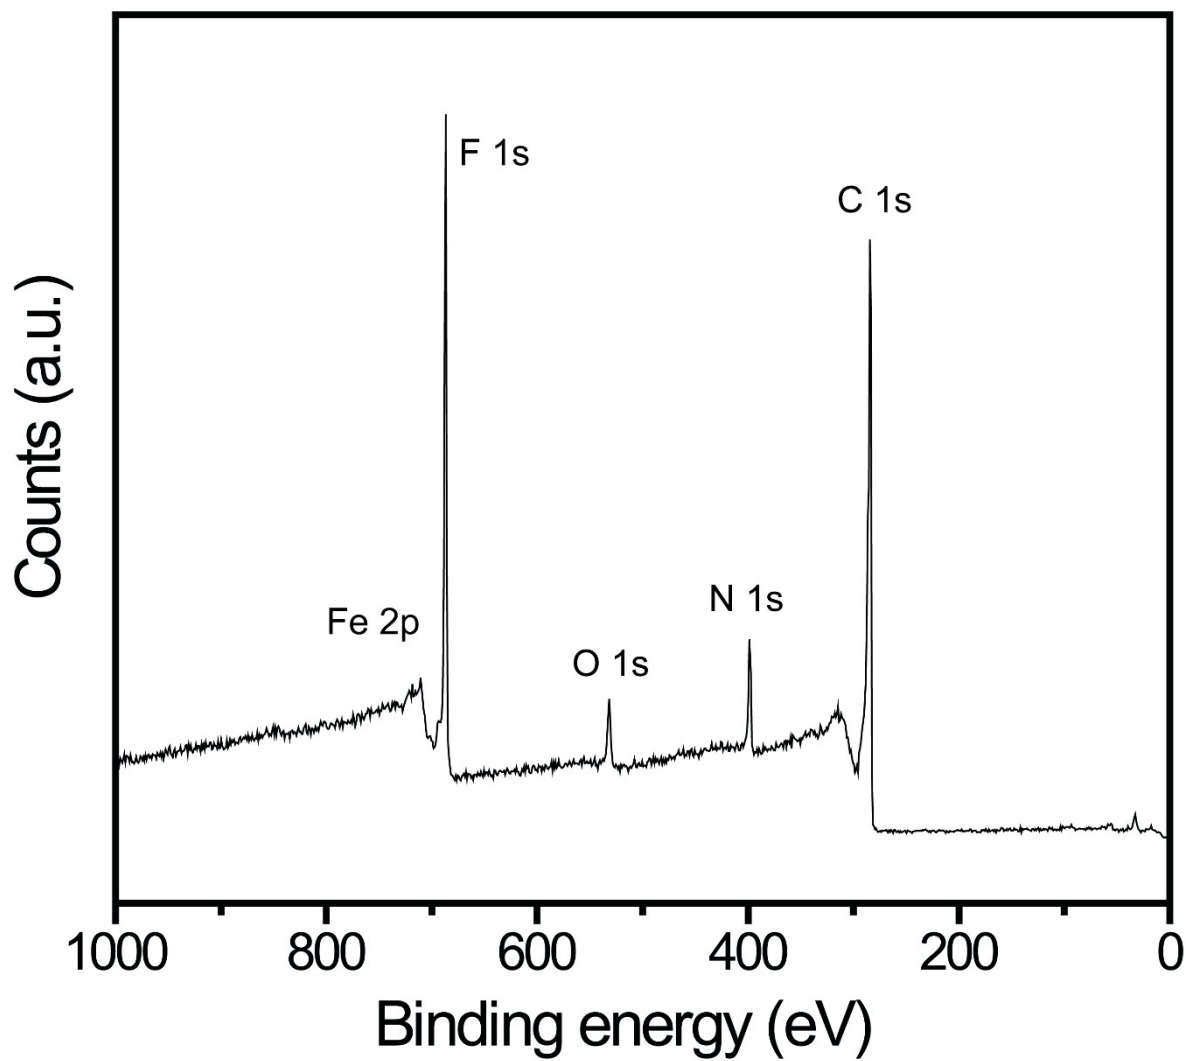

Fig S1. XPS at the long scan region of the 16(F)FePc-CNT.

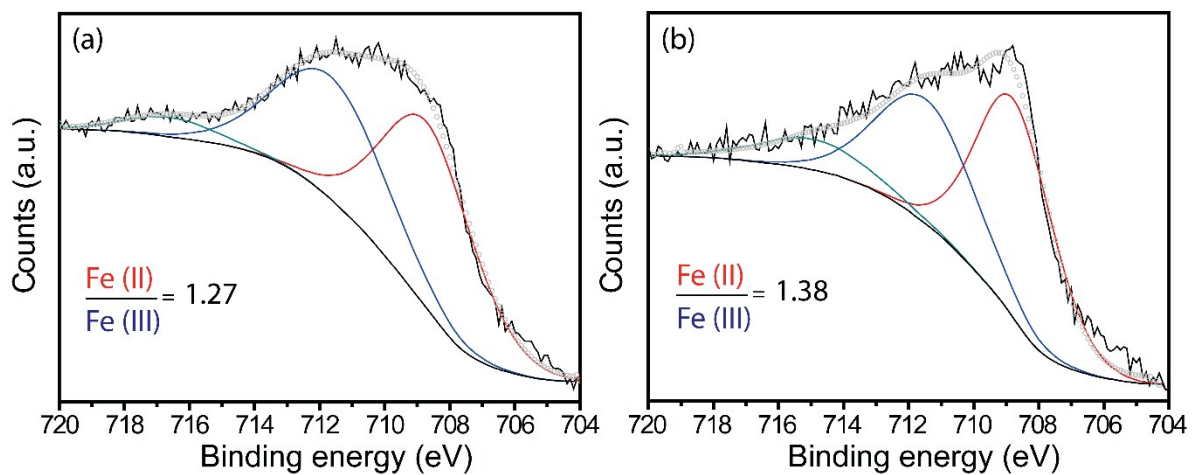

Fig S2. XPS measurements at Fe 2p<sub>3/2</sub> region of 16(F)FePc-CNT (a) before O<sub>2</sub> treatment (b) after O<sub>2</sub> treatment at room temperature. The solid red line represents the Fe (II), and the blue line represents Fe (III), respectively. The grey points represent the best fitting found.
